# Supplementary material
Source: bioRxiv or medRxiv preprint supplement (https://www.biorxiv.org/highwire/filestream/22964/field_highwire_adjunct_files/0/055871-1.pdf)
Supplement: Supplementary file [file 055871-1.pdf]

439 Supporting Material (SM): Contact, travel, &  
 440 transmission

441 **Contents**

442 **S1 Medical claims data** **20**

443 S1.1 Definition of ILI incidence ratio . . . . . 20

444 S1.2 Zip3 ILI incidence ratio during the holidays . . . . . 21

445 S1.3 Estimation of the effective reproductive number . . . . . 21

446 S1.4 Verifying flu activity during the holidays . . . . . 22

447 **S2 Metapopulation model** **23**

448 S2.1 Demographic and contact data . . . . . 23

449 S2.1.1 Age-specific contact matrix . . . . . 24

450 S2.2 Travel data . . . . . 26

451 S2.3 Holiday intervention period . . . . . 26

452 S2.4 Comparison of baseline and holiday air travel networks . . . . . 27

453 **S3 Sensitivity Analysis of Model Results** **28**

454 S3.1 Contribution of contact reduction vs. assortativity to holiday changes . . . . . 28

455 S3.2 Sensitivity of epidemic outcomes to contact reduction . . . . . 29

456 S3.3 Sensitivity of epidemic outcomes to holiday timing . . . . . 29

457 S3.4 Data access . . . . . 33

458 **S1 Medical claims data**

459 **S1.1 Definition of ILI incidence ratio**

460 We use the ILI incidence ratio as defined in [32]. Parameters referenced in the equation are described  
 461 in Table S1.

$$\rho_{w,s} = (d_{w,s}/v_{w,s}) \times (p_s/100,000) \tag{1}$$

462 The incorporation of visits into this metric helps to account for artificialities in the medical claims  
463 data related to to physician office closures and changes to care-seeking behavior during the holidays,  
464 and increasing database coverage over time (Figure S1).

Figure S1: **Total visits to physicians reported by the medical claims dataset drops during holiday periods.** The grey bar highlights the typical school holiday for winter break, and a short dip (not highlighted) in late November demonstrates a similar pattern during the Thanksgiving holiday. Coverage in the medical claims dataset increases over time, as witnessed by the rising visit rates in each flu season.

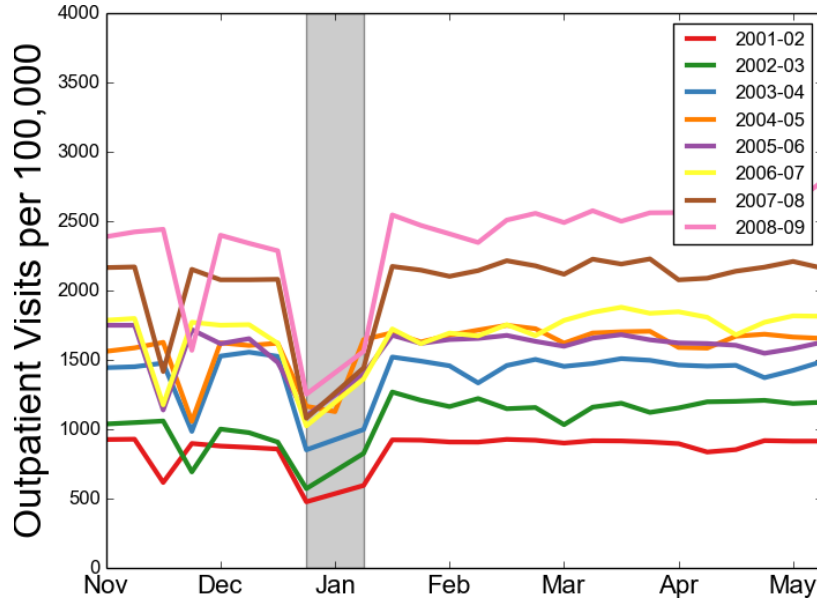

## 465 S1.2 Zip3 ILI incidence ratio during the holidays

466 We observed holiday-associated dips in the ILI incidence ratio at the zip3-level for each season  
467 (Figure S2).

## 468 S1.3 Estimation of the effective reproductive number

469 To understand the effect of the winter holidays on flu transmission in the empirical data, we estimated  
470 the effective reproductive number ( $R_t$ ), the average number of secondary cases generated by each  
471 infected individual under the conditions at time  $t$ , over weekly periods during the eight flu seasons  
472 from 2001-2002 through 2008-2009. We used an estimated serial interval for flu of 3.6 days with  
473 a standard deviation of 1.6 days [55]. These analyses were performed with the EpiEstim package  
474 version 1.1-2 developed for the R programming language (R Foundation for Statistical Computing,  
475 Vienna, Austria) [56]. The EpiEstim data inputs were the U.S. weekly ILI medical claims, adjusted in  
476 two ways: 1) scaled up according to a ratio of total visits during a winter reference week to total visits

Figure S2: **ILI incidence ratio during the holiday period for each study season at the zip3-level.** Each grey line represents the time series for a single zip3, and the dashed line indicates the week including Christmas.

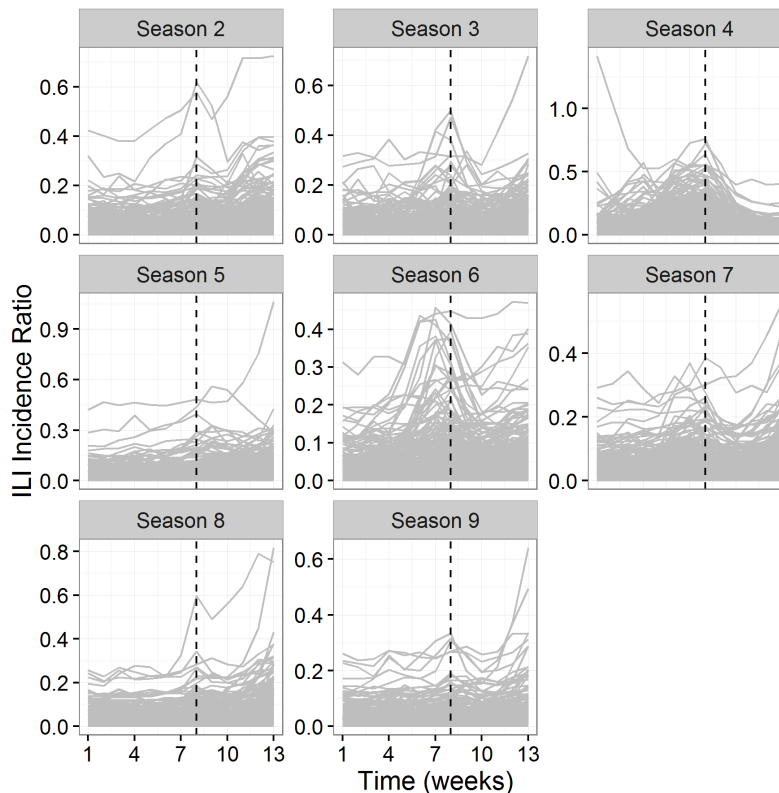

477 during the reporting week, in order to account for temporal changes in healthcare-seeking behavior,  
 478 and 2) scaled up according to estimates that only 45% of the total population symptomatic with  
 479 ILI seeks care from a physician (See SM section S1.3) [57, 58].

480 To account for changes in health care seeking behavior during holiday periods (Figure S1) and  
 481 changes to medical claims coverage over time, we adjusted the raw ILI medical claims data for input  
 482 into the EpiEstim program for estimation of the effective reproductive number  $R_t$ . Parameters  
 483 referenced in the equation are described in Table S1.

$$d_{t,s}^* = (d_{w,s}/C) \times (v_{w_s}/v_{w,s}) \times (1/\phi) \quad (2)$$

#### 484 S1.4 Verifying flu activity during the holidays

485 To examine whether ILI activity was due to influenza during the U.S. Thanksgiving and Christ-  
 486 mas holidays, we used data that is publicly available from CDC's FluView Interactive application.

Table S1: **Parameters in adjustments to ILI medical claims data** The same notation was used to describe the ILI incidence ratio and the adjustments for the effective reproductive number analysis.

| Common terms           |                                                                                                                  |
|------------------------|------------------------------------------------------------------------------------------------------------------|
| $d_{w,s}$              | raw ILI cases at week $w$ in season $s$                                                                          |
| $v_{w,s}$              | total visits to health care facilities for any diagnosis at week $w$ in season $s$                               |
| Specific to equation 1 |                                                                                                                  |
| $\rho_{w,s}$           | ILI incidence ratio (IR) at week $w$ in season $s$                                                               |
| $p_s$                  | population size in season $s$                                                                                    |
| Specific to equation 2 |                                                                                                                  |
| $d_{t,s}^*$            | adjusted ILI cases at day $t$ in season $s$ , input for effective reproductive number analysis                   |
| $v_{w_s}$              | total visits to health care facilities for any diagnosis at winter reference week $w_s$                          |
| $\phi$                 | estimate of the proportion of the total population that seeks care for symptomatic influenza-like illness (0.45) |
| Indicator variables    |                                                                                                                  |
| $w_s$                  | winter reference week (chosen as the week of November 1 in a given season $s$ )                                  |
| $t$                    | indicator for time in days                                                                                       |
| $s$                    | indicator for flu season                                                                                         |
| $w$                    | indicator for time in weeks                                                                                      |
| $C$                    | number of days in a week (7 days)                                                                                |

487 These data were collected by the WHO/NREVSS Collaborating Labs and they represent the per-  
 488 centage of influenza-positive laboratory confirmations among all tested respiratory specimens in this  
 489 CDC influenza surveillance system. We found that flu was regularly circulating by Christmas, but  
 490 largely absent during the earlier Thanksgiving holidays (Figure S3A). During both holiday periods,  
 491 thousands of samples were tested for influenza (Figure S3B).

## 492 S2 Metapopulation model

### 493 S2.1 Demographic and contact data

494 Spatial areas were modeled after metropolitan areas (236 areas were included, covering 79% of the  
 495 U.S. population) as defined by the U.S. Bureau of Transportation Statistics. Each metropolitan  
 496 area's population was divided into children (24%) and adults (76%), according to the national age  
 497 distribution reported in the 2010 U.S. Census. Age-specific contact rates were adapted from a contact  
 498 survey from Germany, given the similarity in demography to the United States [7], and translated  
 499 to a contact matrix between children and adults (See SM section S2.1.1). Transmission parameters  
 500 were chosen so that final epidemic sizes were 15-20% of the population [59], and the recovery rate

Figure S3: **Flu activity is typically present during the Christmas holiday, but largely absent during the Thanksgiving holiday.** A) The percentage of influenza-positive laboratory confirmations over time, as collected from WHO/NREVSS, from the first week in November to the last week in January for flu seasons from 2001 to 2009. B) The number of samples tested for flu from WHO/NREVSS during the holiday period. The black dashed line represents the week of Christmas, and the grey dashed line represents the week of Thanksgiving.

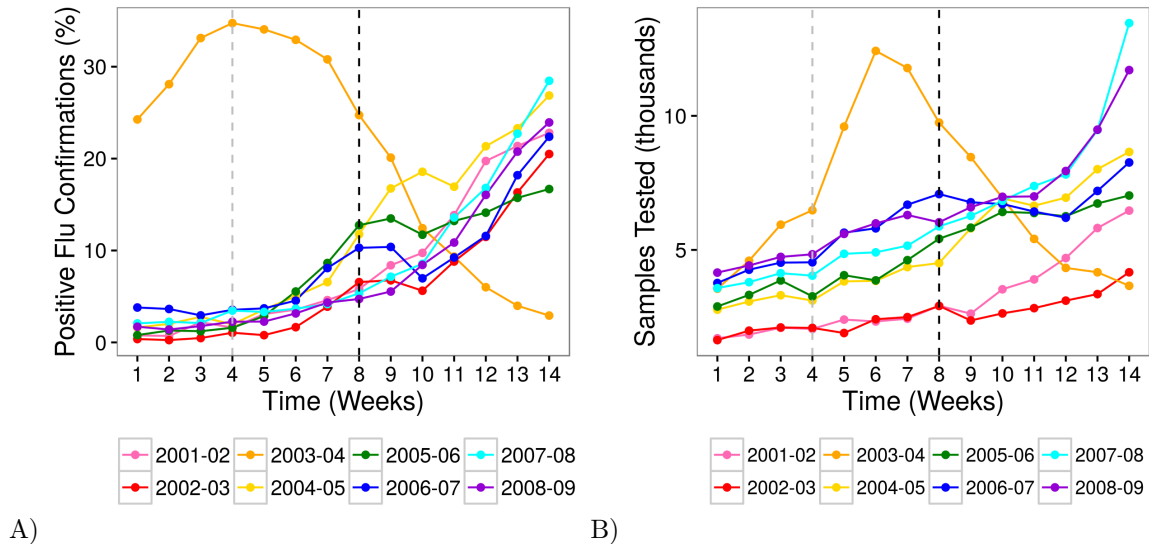

501 corresponded to a two day infectious period, according to epidemiological survey data [60].

### 502 S2.1.1 Age-specific contact matrix

503 We utilize the following contact matrix structure where  $C_{cc}$  is the average number of daily contacts  
 504 between children and  $C_{ac}$  is the average number of daily adult contacts reported by children, etc.

$$\begin{pmatrix} C_{cc} & C_{ca} \\ C_{ac} & C_{aa} \end{pmatrix}$$

505 Of the countries included in the study by Mossong et al ([7]), Germany represents a population  
 506 most similar to the United States. Thus, we calculated the average number of daily contacts from  
 507 German contact data using the following matrix, where  $q_c$  is the average number of child daily  
 508 contacts weighted by German child population size,  $q_a$  is the average number of adult daily contacts  
 509 weighted by German adult population size,  $p_c$  is the fraction of child daily contacts that occur  
 510 with other children,  $p_a$  is the fraction of adult daily contacts that occur with other adults [7]. The

511 parameter  $\alpha$  is the fraction of the U.S. population represented by children [33].

$$\begin{pmatrix} p_c q_c / \alpha & (1 - p_a) q_a / \alpha \\ (1 - p_c) q_c / (1 - \alpha) & p_a q_a / (1 - \alpha) \end{pmatrix}$$

512 Age subgroups of children are indicated with subscript  $i$  (0-5, 10-14, and 15-19 years old), age  
 513 subgroups of adults are indicated with subscript  $j$  (20-24, 25-29, 30-34, 35-39, 40-44, 45-49, 50-54,  
 514 55-59, 60-64, 65-69 years old). The average number of child daily contacts  $q_c$  and adult daily contacts  
 515  $q_a$  were calculated, where  $x_{i,l}$  is the number of daily contacts between age subgroup  $i$  and all ages  
 516  $l$ ,  $g_i$  or  $g_j$  is the population size of the age subgroup,  $g_c$  is the total child population size, and  $g_a$  is  
 517 the total adult population size, and the number of subgroups for children and adults are denoted by  
 518  $N_i$  and  $N_j$ , respectively.

$$q_c = \sum_{i=1}^{N_i} (x_{i,l} \times g_i) / (g_c) \quad (3)$$

$$q_a = \sum_{j=1}^{N_j} (x_{j,l} \times g_j) / (g_a) \quad (4)$$

519 The fraction of child daily contacts that occur with other children  $p_c$  and the fraction of adult  
 520 daily contacts that occur with other adults  $p_a$  were calculated as the ratio of the average number of  
 521 within group contacts  $r_{c/a}$  to the average number of total contacts  $q_{c/a}$ .

$$p_c = r_c / q_c \quad (5)$$

$$p_a = r_a / q_a \quad (6)$$

522 The average number of daily contacts that children had with other children  $r_c$  and that adults  
 523 had with other adults  $r_a$  was calculated, where  $x_{i,c}$  is the average number of daily contacts of child  
 524 subgroup  $i$  with children  $c$ , and  $x_{i,a}$  is the average number of daily contacts of adult subgroup  $i$  with  
 525 adults  $a$ .

$$r_c = \sum_{i=1}^{N_i} (x_{i,c} \times g_i) / (g_c) \quad (7)$$

$$r_a = \sum_{j=1}^{N_j} (x_{j,a} \times g_j) / (g_a) \quad (8)$$

526 Given this structure, we present three contact matrices used in multiple analyses, in order: the

527 non-holiday contact matrix, the full holiday contact matrix, and the partial contact matrix (SM  
528 only).

$$\begin{pmatrix} 18.59 & 4.21 \\ 5.58 & 8.84 \end{pmatrix}$$

529

$$\begin{pmatrix} 7.78 & 2.55 \\ 5.83 & 8.15 \end{pmatrix}$$

530

$$\begin{pmatrix} 10.47 & 3.68 \\ 3.14 & 7.03 \end{pmatrix}$$

## 531 **S2.2 Travel data**

532 Travel movement rates were derived from domestic air traffic network data from the U.S. Bureau  
533 of Transportation Statistics from January to March 2005 (to represent baseline winter travel in the  
534 U.S.). The T100D Market Carriers table had data on the origin metropolitan area, the destination  
535 metropolitan area, and the average number of passengers traveling in a given month [61]. The average  
536 number of monthly passengers traveling between two metro areas  $i$  and  $j$  (in either direction),  
537 reported in the raw transportation data, was converted to the daily number of passengers  $w_{ij}$   
538 traveling between two metro areas and used to determine travel flows between metro areas in the  
539 model at each time step. Travel rates were calculated separately for each age group and metro area  
540 pair  $i$  and  $j$ , by considering the population size and age breakdown of metro area  $i$ , the daily number  
541 of travelers between  $i$  and  $j$   $w_{ij}$ , and the fraction of children who are travelers  $r$ . Children did not  
542 travel in the baseline model ( $r = 0$ ), similar to previous studies [4, 33], because only 3% of travelers  
543 are children and less than 1% of trips made by children are greater than 30 miles during school term  
544 time [20].

## 545 **S2.3 Holiday intervention period**

546 The holiday period was chosen relative to the epidemic peak in the baseline model, based on the  
547 average duration from Christmas to the epidemic peak in the empirical data. The 14-day holiday  
548 period began 7 days before Christmas, and ended 7 days after Christmas to reflect the typical length  
549 of a winter break school holiday.

## 550 S2.4 Comparison of baseline and holiday air travel networks

551 We compared the baseline and holiday travel networks across common network measures for un-  
552 weighted and weighted networks (Table S2). The baseline network represented average travel pat-  
553 terns from January to March 2005 (a typical winter period), the holiday network represented average  
554 travel patterns during December 2005 (a typical winter holiday period), and weights represented the  
555 average number of monthly passengers between two metro areas. The descriptive characteristics and  
556 unweighted network measures present the overall features and potential for connectivity, while the  
557 weighted network measures recast connectivity potential in the context of the volume of travel. The  
558 baseline network had a greater number of edges and larger average number of absolute connections  
559 (unweighted mean degree), while the holiday network had a greater maximum average number of  
560 passengers and larger passenger flows (weighted mean degree). This indicates that during the holi-  
561 days, there is simultaneously a greater volume of travelers and a lower connectivity potential between  
562 airports, perhaps suggesting that this increased volume of holiday travelers seeks out fewer locations  
563 (e.g., holiday travelers flock to the largest cities). The holiday network appeared less right-skewed  
564 for the unweighted degree distribution and more right-skewed for the weighted degree distribution,  
565 corroborating the idea that the baseline network presented greater opportunities for connectivity  
566 between airports, but that the holiday network demonstrated an overall greater volume of travel  
567 (Figure S4).

568 These patterns were corroborated in examining differences between holiday and baseline network  
569 unweighted and weighted degrees (Figure S5), but differences between urban and rural connectivity  
570 during winter baseline and holiday periods may be obscured by the undirected nature of our network  
571 edge weights.

572 Airports had many fewer unique airport connections (unweighted degree) during holidays but  
573 similar or greater numbers of passengers (weighted degree) flowing through those airports. Notably,  
574 in comparing Figure S5A and Figure S5B, all of the decreases in unique airport connections were  
575 observed in small and medium sized cities, while airports in populous cities maintained similar  
576 numbers of flight connections during the holidays.



Table S2: Comparison of baseline and holiday air travel networks across network measures.

|                                                                              | Baseline  | Holiday   |
|------------------------------------------------------------------------------|-----------|-----------|
| <b>Descriptive characteristics</b>                                           |           |           |
| Number of nodes                                                              | 228       | 225       |
| Number of edges                                                              | 4,189     | 3,187     |
| Maximum of the average number of monthly passengers between two destinations | 7,276,232 | 7,586,460 |
| <b>Unweighted measures</b>                                                   |           |           |
| Mean degree                                                                  | 36.75     | 28.33     |
| Transitivity                                                                 | 0.54      | 0.50      |
| Average clustering coefficient                                               | 0.61      | 0.62      |
| Average shortest path length                                                 | 2.03      | 2.11      |
| <b>Weighted measures</b>                                                     |           |           |
| Mean degree                                                                  | 4,904,132 | 5,106,540 |
| Average clustering coefficient                                               | 0.0041    | 0.0067    |
| Average shortest path length                                                 | 5,689     | 14,232    |

Figure S4: **The holiday air travel network had fewer potential connections and a greater volume of travel than the winter baseline travel network.** A) The unweighted degree distribution appeared more right-skewed for the baseline network, while B) the weighted degree distribution appeared more right-skewed for the holiday network. The black vertical line in each figure represents the unweighted or weighted mean degree, as appropriate.

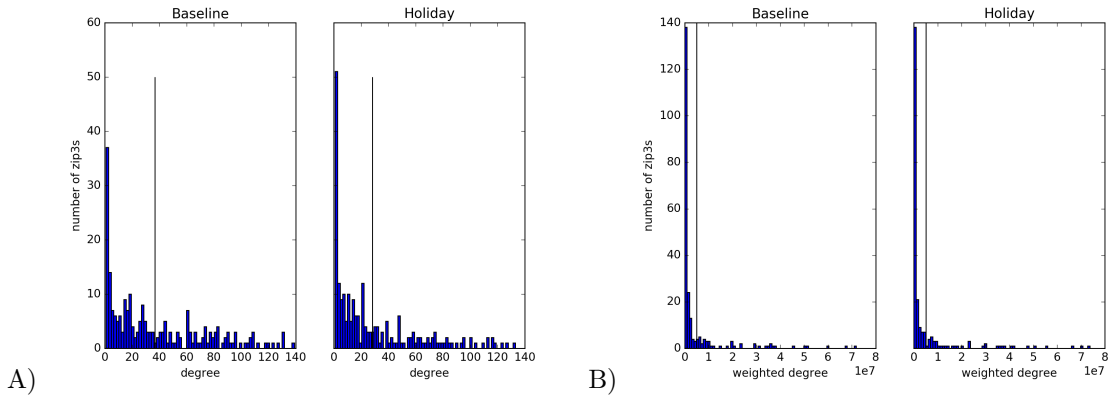

### 577 S3 Sensitivity Analysis of Model Results

#### 578 S3.1 Contribution of contact reduction vs. assortativity to holiday changes

579 We acknowledge that the contact component of our model’s holiday intervention combines two  
 580 changes: 1) an overall reduction in contact rate, and 2) a change in the relative proportion of mixing  
 581 between age groups. Here, we compare the baseline and main text contact intervention results  
 582 (here, called ‘full school closure’) with simulations that reduced the age-specific number of contacts  
 583 but kept assortative mixing among age groups the same as that in the non-holiday contact matrix

Figure S5: **The holiday air travel network experienced increased volume of travelers across similar or fewer unique airport connections.** Baseline network weighted and unweighted degrees were subtracted from holiday network weighted and unweighted degrees to represent the difference in weighted and unweighted degree metrics, respectively. A) Airports tended to have fewer unique connections during the holiday period (difference in unweighted degree) while maintaining similar numbers of passenger throughput (difference in weighted degree). B) In comparing difference in unweighted degree to population, decreases in unique airport connections were observed in small and medium sized cities, while airports in populous cities maintained similar numbers of flight connections during the holidays.

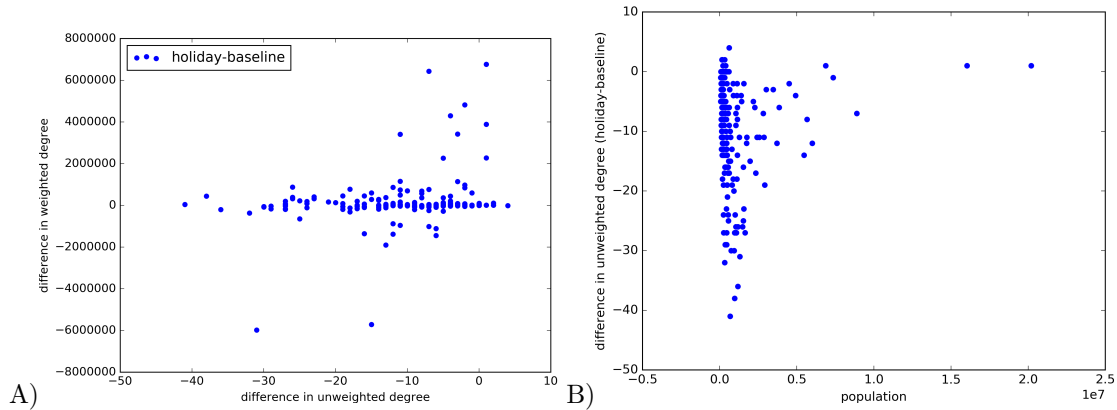

584 ('partial school closure') (Figure S6).

### 585 S3.2 Sensitivity of epidemic outcomes to contact reduction

586 We examined the sensitivity of epidemic outcomes to overall reductions in contact rate (called 'partial  
 587 school closure' in Section S3.1). Two additional sets of simulations were performed, and relative to  
 588 the original partial school closure simulations ('partial school closure'), they represented: 1) a 10%  
 589 greater reduction in age-specific contacts ('-10% contact rate') and 2) a 10% smaller reduction in  
 590 age-specific contacts ('+10% contact rate'). With larger contact rates (+10% contact rate), incidence  
 591 peaks were earlier and smaller in magnitude. Synchrony was greater during the holiday period with  
 592 lower contact rates than with higher contact rates, as represented with the narrower flu incidence  
 593 distribution (Figure S7).

### 594 S3.3 Sensitivity of epidemic outcomes to holiday timing

595 We examined the sensitivity of model outcomes to holiday timings shifted three weeks ('+3 weeks')  
 596 and six weeks ('+6 weeks') forward relative to the holiday timing presented in the main text ('ac-  
 597 tual'). The holiday reduced flu incidence to low levels (Figure S8) and shifted relative risk of disease  
 598 from children to adults (Figure S9) consistently across various holiday timings. Compared to the  
 599 actual holiday simulations, peak timing was delayed for most locations in the +3 weeks simulations,

Figure S6: **A)** Total flu incidence per 10,000 population over time, averaged across all simulations. **B)** Distribution of time steps to peak across all metro areas, averaged across all simulations. **C)** Distributions of flu incidence across all metro areas averaged for the two week durations defined as ‘before’, ‘during’, and ‘after’ the holiday periods, averaged across all simulations. Distributions across metros are compared for the baseline, age-specific reduction in number of contact (partial school closure), and the main text contact only intervention (full school closure) simulations. The intervention period is demarcated by black dashed lines, as appropriate.

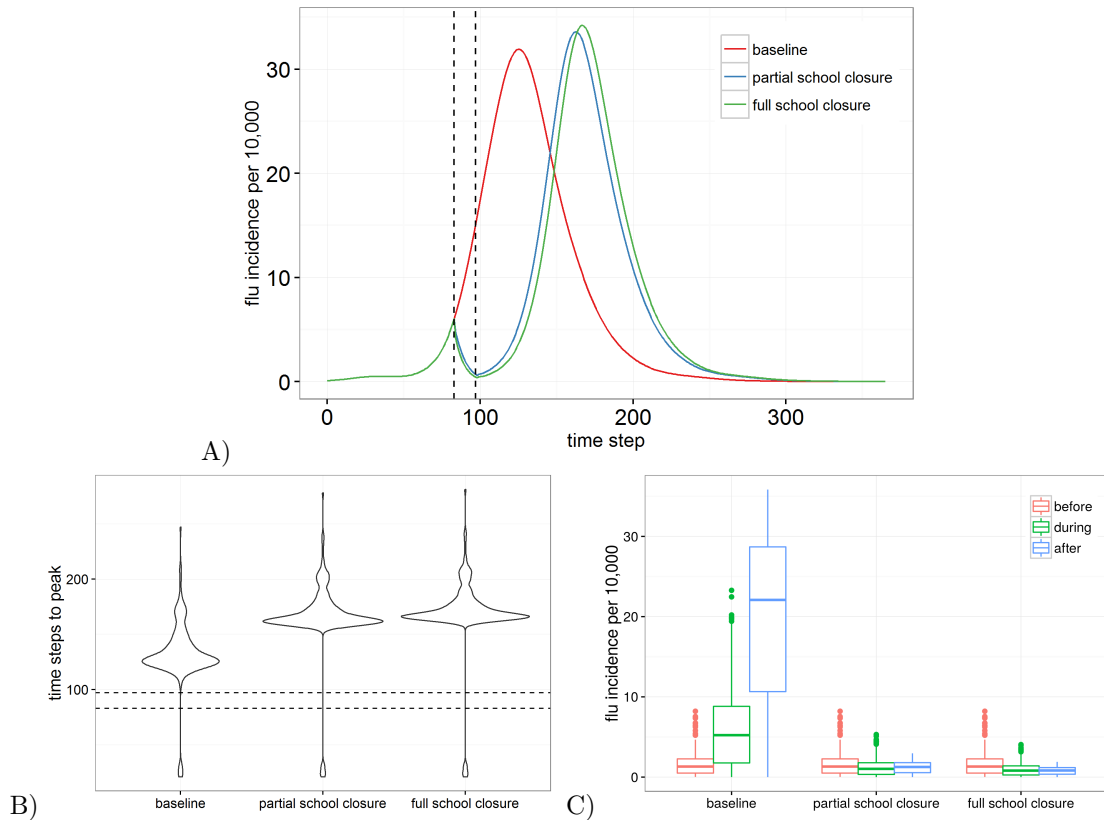

600 and only for some locations in the +6 weeks simulations (Figure S10). While we expect holidays to  
 601 delay epidemic peaks, many locations had already peaked by the time of the holiday in the +6 weeks  
 602 simulations. Similarly, holidays consistently damped flu incidence and increase spatial synchrony  
 603 across different timings, but the magnitude of recovery during the ‘after’ holiday period depended  
 604 on the remaining susceptibility of the population (Figure S11).

Table S3: Percentage infected out of the total population, averaged across simulations.

| Holiday Timing | Baseline | Travel | (Full) School Closure | Partial School Closure | Holiday |
|----------------|----------|--------|-----------------------|------------------------|---------|
| No holiday     | 18.28    | -      | -                     | -                      | -       |
| Actual         | -        | 18.32  | 17.68                 | 17.67                  | 17.73   |
| +3 weeks       | -        | 18.26  | 16.02                 | -                      | 15.96   |
| +6 weeks       | -        | 18.29  | 14.92                 | -                      | 14.89   |

Figure S7: **A)** Total flu incidence per 10,000 population over time, averaged across all simulations. **B)** Distribution of time steps to peak across all metro areas, averaged across all simulations. **C)** Distributions of flu prevalence across all metro areas averaged for the two week durations defined as ‘before’, ‘during’, and ‘after’ the holiday periods, averaged across all simulations. Distributions across metros are compared for partial school closure, and 10% greater reduction (-10% contacts) and 10% smaller reduction (+10% contacts) in age-specific number of contacts. The intervention period is demarcated by black dashed lines, as appropriate.

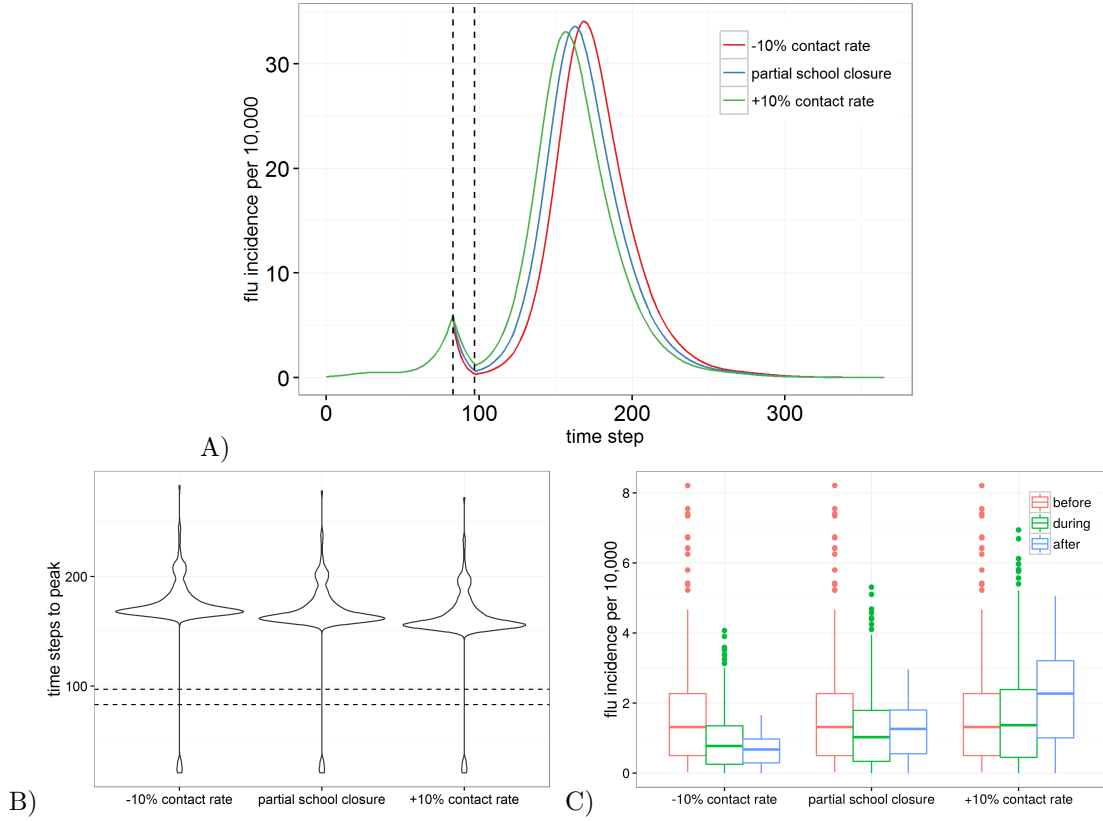

Figure S8: **A)** Total flu incidence per 10,000 population over time, averaged across all simulations for holiday periods shifted forward by **A)** three weeks and **B)** six weeks. Epidemic trajectories for the baseline (no changes during intervention period), travel only, school closure only, and full holiday (travel and school closure changes) interventions are compared, and the intervention period is demarcated by the dashed black lines.

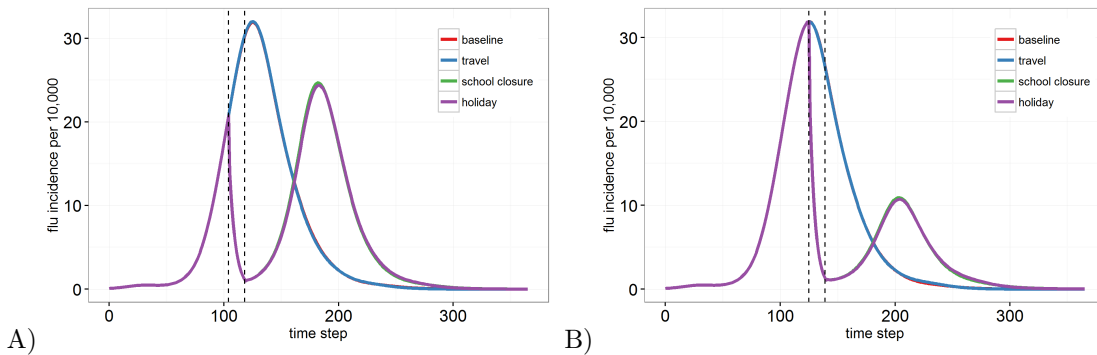

Figure S9: Relative risk of disease from children to adults across all locations, averaged across all simulations, for holiday periods shifted forward by **A)** three weeks and **B)** six weeks. Epidemic trajectories for the baseline (no changes during intervention period), travel only, school closure only, and full holiday (travel and school closure changes) interventions are compared, and the intervention period is demarcated by the dashed black lines.

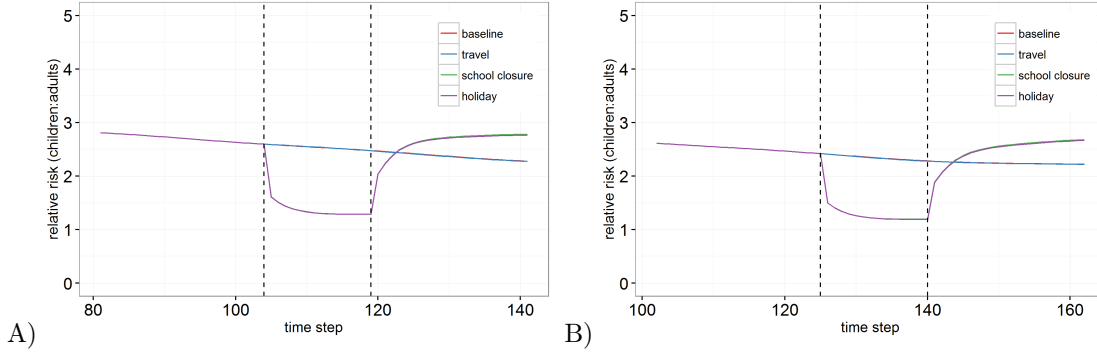

Figure S10: **A)** Distribution of time steps to peak across all metro areas, averaged across all simulations for holiday periods shifted forward by **A)** three weeks and **B)** six weeks. Distributions across metros are compared for the baseline, travel only, school closure only, and full holiday interventions, and the intervention period is demarcated by the dashed black lines.

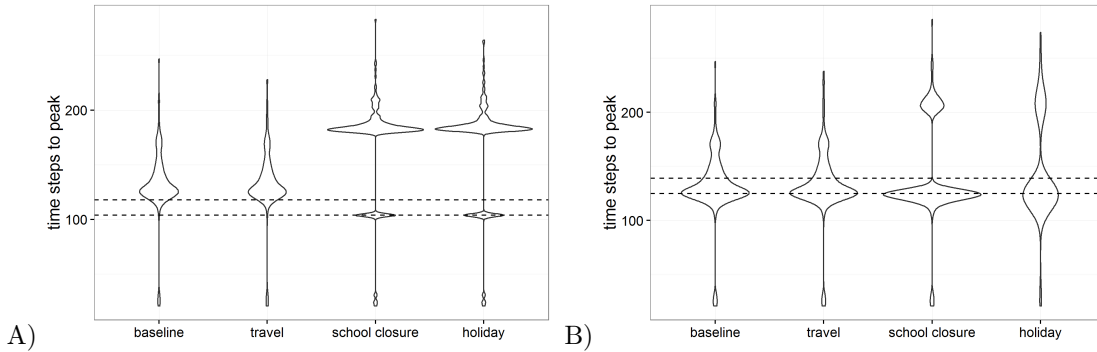

Figure S11: Distributions of flu prevalence across all metro areas averaged for the two week durations defined as ‘before,’ ‘during,’ and ‘after’ the holiday periods for three holiday intervention (travel and school closure) timings, averaged across all simulations.

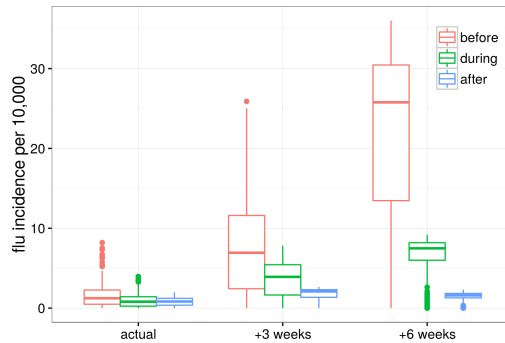

### 605 **S3.4 Data access**

606 Simulation code and model outputs averaged across all seeds for all intervention combinations and  
607 holiday timings will be made available at <https://github.com/bansallab>.
